# Supplementary material for: Treatment Failure and Long-Term Prescription Risk for Guideline-Recommended Hypnotics in Japan
Source: PubMed Central journal article supplement (PMC11024780; doi:10.1001/jamanetworkopen.2024.6865), 2024-04-17
Supplement: jamanetwopen-e246865-s001.pdf [file jamanetwopen-e246865-s001.pdf]

## Supplementary Online Content

Takeshima M, Yoshizawa K, Ogasawara M, et al. Treatment failure and long-term prescription risk for guideline-recommended hypnotics in Japan. *JAMA Netw Open*. 2024;7(4):e246865. doi:10.1001/jamanetworkopen.2024.6865

**eMethods.** Comorbid Physical and Psychiatric Disorders and Cox Proportional Hazards Modeling

**eFigure 1.** Specific Examples of Monotherapy Failure or Monotherapy Discontinuation Events

**eFigure 2.** Assumptions of the Cox Proportional Hazards Regression Model

**eFigure 3.** Participant Selection Flowchart

**eFigure 4.** Cox Proportional Hazards Regression Analysis for Monotherapy Failure

**eTable 1.** List of Hypnotics Covered by Insurance in Japan

**eTable 2.** List of Anxiolytics Covered by Insurance in Japan

**eTable 3.** List of Antidepressants Covered by Insurance in Japan

**eTable 4.** List of Antipsychotics Covered by Insurance in Japan

**eTable 5.** Crude and Adjusted Cox Proportional Hazards Regression Analysis

**eTable 6.** Sensitivity Analyses of Cox Proportional Hazards Regression Analysis

**eTable 7.** Events Occurring Within 6 Months of First Prescription of Guideline-Recommended Hypnotics Among Patients Without Failure of Guideline-Recommended Hypnotic Monotherapy

**eTable 8.** Crude and Adjusted Logistic Regression Analyses

This supplementary material has been provided by the authors to give readers additional information about their work.

## **eMethods.** Comorbid Physical and Psychiatric Disorders and Cox Proportional Hazards Modeling

### **Comorbid physical and psychiatric disorders considered in this study based on the 10th revision of the International Statistical Classification of Diseases and Related Health Problems (ICD-10):**

#### Psychiatric disorders

F0, mental disorders due to known physiological conditions; F1, mental and behavioral disorders due to psychoactive substance use; F2, schizophrenia, schizotypal, delusional, and other non-mood psychotic disorders; F3, mood disorders; F4, anxiety, dissociative, stress-related, somatoform and other nonpsychotic mental disorders; F5, behavioral syndromes associated with physiological disturbances and physical factors; F6, disorders of adult personality and behavior; F7, intellectual disabilities; F8, pervasive and specific developmental disorders; F9, behavioral and emotional disorders with onset usually occurring in childhood and adolescence.

#### Physical disorders

Hypertension, hyperlipidemia, diabetes mellitus, cancer, rheumatoid arthritis, Parkinson's disease, multiple sclerosis, bronchial asthma, chronic obstructive pulmonary disease, coronary artery disease, pulmonary embolism, deep vein thrombosis, hypothyroidism, subarachnoid hemorrhage, nontraumatic intracerebral hemorrhage, cerebral infarction, heart failure, and inflammatory bowel disease.

#### **Testing the Cox proportional hazards modeling assumptions:**

The Cox proportional hazards model assumptions were tested using the STATA procedure 'estat phtest' (STATA 13.0; Stata Corp, College Station, TX) and by plotting Schoenfeld residuals against time-period of the first prescription of hypnotics. There was no evidence of deviation from proportional hazards for time-period ( $p > 0.05$ , with no apparent slope in the residual plots) (eFigure 1). Therefore, a proportional hazard was established.

**eFigure 1.** Specific Examples of Monotherapy Failure or Monotherapy Discontinuation Events

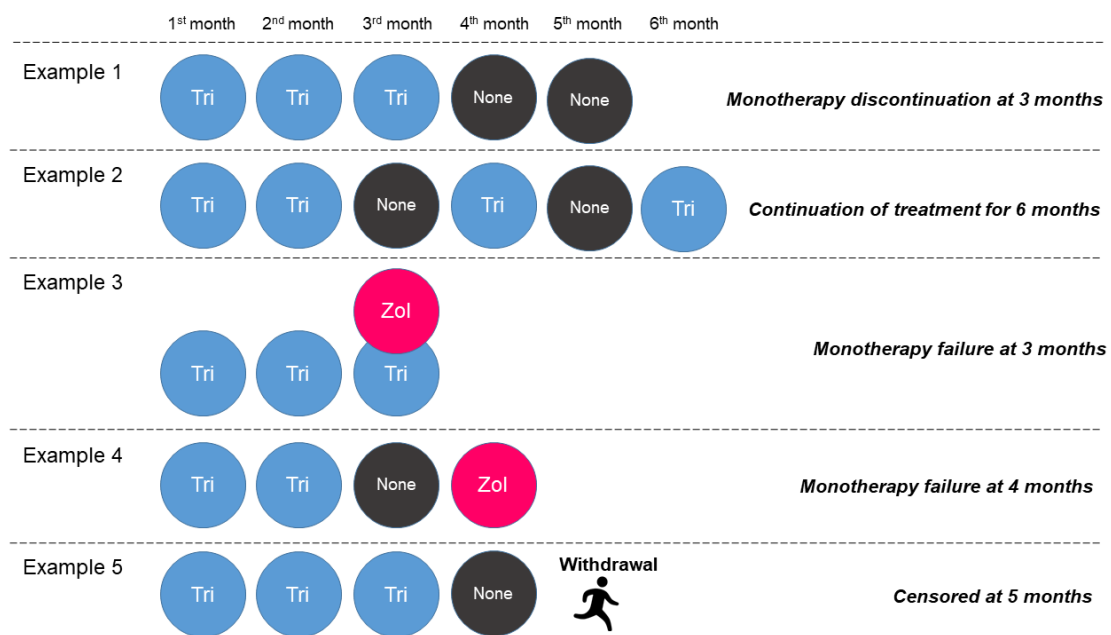

**Abbreviations:** Tri, triazolam; Zol, zolpidem

**eFigure 2.** Assumptions of the Cox Proportional Hazards Regression Model

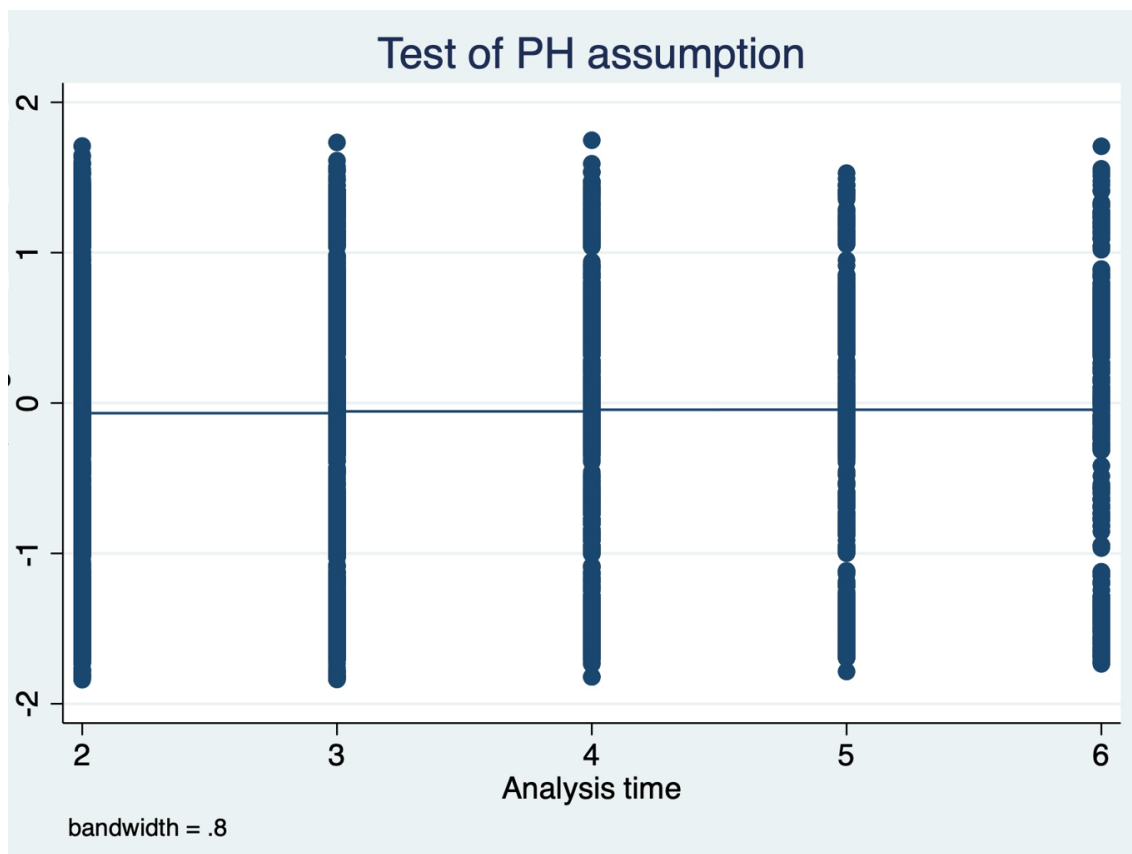

**eFigure 3. Participant Selection Flowchart**

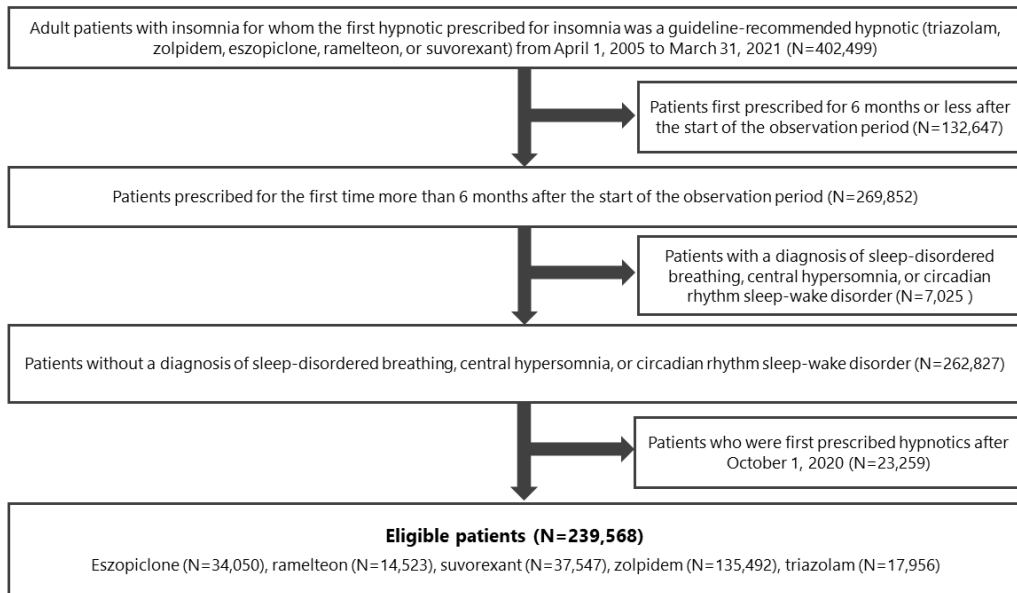

**eFigure 4.** Cox Proportional Hazards Regression Analysis for Monotherapy Failure

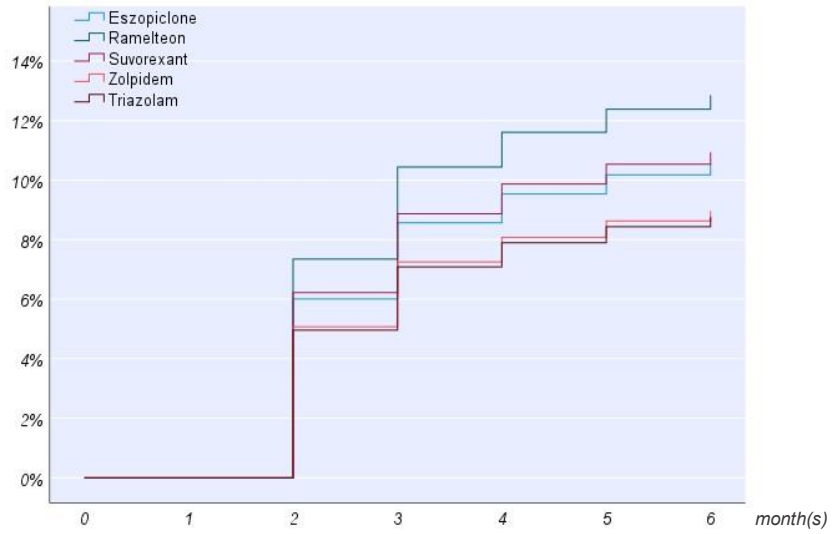

**eTable 1.** List of Hypnotics Covered by Insurance in Japan

| Generic name                      | ATC code | Introduction  |
|-----------------------------------|----------|---------------|
| <b>Benzodiazepine</b>             |          |               |
| Brotizolam                        | N05CD09  | Prior to 2005 |
| Estazolam                         | N05CD04  | Prior to 2005 |
| Etizolam                          | N05BA19  | Prior to 2005 |
| Flunitrazepam                     | N05CD03  | Prior to 2005 |
| Flurazepam                        | N05CD01  | Prior to 2005 |
| Haloxazolam                       | —        | Prior to 2005 |
| Lormetazepam                      | N05CD06  | Prior to 2005 |
| Nimetazepam                       | N05CD15  | Prior to 2005 |
| Nitrazepam                        | N05CD02  | Prior to 2005 |
| Quazepam                          | N05CD10  | Prior to 2005 |
| Rilmazafone                       | —        | Prior to 2005 |
| Triazolam                         | N05CD05  | Prior to 2005 |
| <b>Non-benzodiazepine</b>         |          |               |
| Eszopiclone                       | N05CF04  | April 2012    |
| Zolpidem                          | N05CF02  | Prior to 2005 |
| Zopiclone                         | N05CF01  | Prior to 2005 |
| <b>Melatonin receptor agonist</b> |          |               |
| Melatonin <sup>A</sup>            | N05CH01  | June 2020     |
| Ramelteon                         | N05CH02  | July 2010     |
| <b>Orexin receptor antagonist</b> |          |               |
| Lemborexant                       | —        | June 2020     |
| Suvorexant                        | N05CM19  | November 2014 |

Note: <sup>A</sup>Insurance coverage is available for difficulty falling asleep associated with childhood neurodevelopmental disorders.

Abbreviation: ATC, Anatomical Therapeutic Chemical classification 2021

**eTable 2.** List of Anxiolytics Covered by Insurance in Japan

| Generic name     | ATC code |
|------------------|----------|
| Alprazolam       | N05BA12  |
| Bromazepam       | N05BA08  |
| Chlordiazepoxide | N05BA02  |
| Clorazepate      | N05BA05  |
| Clotiazepam      | N05BA21  |
| Cloxazolam       | N05BA22  |
| Diazepam         | N05BA01  |
| Etizolam         | N05BA19  |
| Fludiazepam      | N05BA17  |
| Flutazolam       | —        |
| Flutoprazepam    | —        |
| Hydroxyzine      | N05BB01  |
| Loflazepate      | N05BA18  |
| Lorazepam        | N05BA06  |
| Medazepam        | N05BA03  |
| Mexazolam        | N05BA25  |
| Oxazepam         | N05BA04  |
| Oxazolam         | —        |
| Prazepam         | N05BA11  |
| Tandospirone     | —        |
| Tofisopam        | N05BA23  |

ATC, Anatomical Therapeutic Chemical classification 2021



**eTable 3.** List of Antidepressants Covered by Insurance in Japan

| Generic name  | ATC code |
|---------------|----------|
| Amitriptyline | N06AA09  |
| Amoxapine     | N06AA17  |
| Clomipramine  | N06AA04  |
| Desipramine   | N06AA01  |
| Dosulepin     | N06AA16  |
| Duloxetine    | N06AX21  |
| Escitalopram  | N06AB10  |
| Fluvoxamine   | N06AB08  |
| Imipramine    | N06AA02  |
| Lofepramine   | N06AA07  |
| Maprotiline   | N06AA21  |
| Mianserin     | N06AX03  |
| Milnacipran   | N06AX17  |
| Mirtazapine   | N06AX11  |
| Nortriptyline | N06AA10  |
| Paroxetine    | N06AB05  |
| Safrazine     | —        |
| Sertraline    | N06AB06  |
| Setiptiline   | —        |
| Sulpiride     | N05AL01  |
| Trazodone     | N06AX05  |
| Trimipramine  | N06AA06  |
| Venlafaxine   | N06AX16  |
| Vortioxetine  | N06AX26  |

ATC, Anatomical Therapeutic Chemical classification 2021

**eTable 4.** List of Antipsychotics Covered by Insurance in Japan

| Generic name            | ATC code |
|-------------------------|----------|
| Aripiprazole            | N05AX12  |
| Asenapine               | N05AH05  |
| Blonanserin             | —        |
| Blonanserin (tape)      | —        |
| Brexpiprazole           | N05AX16  |
| Bromperidol             | N05AD06  |
| Carpipramine            | —        |
| Chlorpromazine          | N05AA01  |
| Clocapramine            | —        |
| Clozapine               | N05AH02  |
| Floropipamide           | —        |
| Fluphenazine            | N05AB02  |
| Haloperidol             | N05AD01  |
| Levomepromazine         | N05AA02  |
| Lurasidone              | N05AE05  |
| Moperone                | N05AD04  |
| Mosapramine             | N05AX10  |
| Nemonapride             | —        |
| Olanzapine              | N05AH03  |
| Oxypertine              | N05AE01  |
| Paliperidone            | N05AX13  |
| Perospirone             | —        |
| Perphenazine            | N05AB03  |
| Pimozide                | N05AG02  |
| Prochlorperazine        | N05AB04  |
| Propericyazine          | —        |
| Quetiapine              | N05AH04  |
| Risperidone             | N05AX08  |
| Siperone                | —        |
| Sulpiride               | N05AL01  |
| Sultopride              | N05AL02  |
| Tiapride                | N05AL03  |
| Thioridazine            | N05AC02  |
| Timiperone <sup>†</sup> | —        |
| Trifluoperazine         | N05AB06  |
| Zotepine                | N05AX11  |

ATC, Anatomical Therapeutic Chemical classification 2021

**eTable 5.** Crude and Adjusted Cox Proportional Hazards Regression Analysis

|                                       | cHR (95% CI) <sup>a</sup> | P-value            | aHR (95% CI) <sup>a,b</sup> | P-value            |
|---------------------------------------|---------------------------|--------------------|-----------------------------|--------------------|
| <b>Guideline-recommended hypnotic</b> |                           |                    |                             |                    |
| Eszopiclone                           | 1 [Reference]             |                    | 1 [Reference]               |                    |
| Ramelteon                             | 1.28 (1.22–1.35)          | <.001 <sup>d</sup> | 1.23 (1.17–1.30)            | <.001 <sup>d</sup> |
| Suvorexant                            | 1.07 (1.03–1.12)          | .002 <sup>c</sup>  | 1.04 (0.99–1.08)            | .091               |
| Zolpidem                              | 0.74 (0.71–0.76)          | <.001 <sup>d</sup> | 0.84 (0.81–0.87)            | <.001 <sup>d</sup> |
| Triazolam                             | 0.78 (0.74–0.83)          | <.001 <sup>d</sup> | 0.82 (0.78–0.87)            | <.001 <sup>d</sup> |
| <b>Age group</b>                      |                           |                    |                             |                    |
| 20–39 years                           | 1 [Reference]             |                    | 1 [Reference]               |                    |
| 40–64 years                           | 0.75 (0.73–0.77)          | <.001 <sup>d</sup> | 0.88 (0.86–0.91)            | <.001 <sup>d</sup> |
| 65 years or more                      | 0.64 (0.60–0.68)          | <.001 <sup>d</sup> | 0.85 (0.80–0.90)            | <.001 <sup>d</sup> |
| <b>Sex</b>                            |                           |                    |                             |                    |
| Male                                  | 1 [Reference]             |                    | 1 [Reference]               |                    |
| Female                                | 0.84 (0.82–0.86)          | <.001 <sup>d</sup> | 0.90 (0.88–0.93)            | <.001 <sup>d</sup> |
| <b>Prescription instruction</b>       |                           |                    |                             |                    |
| As-needed only                        | 1 [Reference]             |                    | 1 [Reference]               |                    |
| Regular                               | 1.64 (1.59–1.69)          | <.001 <sup>d</sup> | 1.45 (1.41–1.50)            | <.001 <sup>d</sup> |
| <b>Physical comorbidities</b>         |                           |                    |                             |                    |
| Hypertension                          | 0.84 (0.81–0.87)          | <.001 <sup>d</sup> | 1.02 (0.98–1.06)            | .36                |
| Hyperlipidemia                        | 0.86 (0.83–0.89)          | <.001 <sup>d</sup> | 0.99 (0.95–1.04)            | .73                |
| Diabetes                              | 0.88 (0.85–0.92)          | <.001 <sup>d</sup> | 1.03 (0.98–1.08)            | .32                |
| Cancer                                | 0.93 (0.88–0.97)          | .002 <sup>c</sup>  | 1.37 (1.30–1.44)            | <.001 <sup>d</sup> |
| Rheumatoid arthritis                  | 0.90 (0.79–1.02)          | .10                | 1.08 (0.95–1.23)            | .24                |
| Parkinson's disease                   | 1.39 (1.19–1.62)          | <.001 <sup>d</sup> | 1.09 (0.93–1.28)            | .28                |
| Multiple sclerosis                    | 0.89 (0.57–1.38)          | .59                | 1.16 (0.75–1.80)            | .50                |
| Asthma                                | 0.91 (0.86–0.96)          | <.001 <sup>d</sup> | 1.01 (0.96–1.07)            | .61                |
| Chronic obstructive pulmonary disease | 1.08 (0.92–1.26)          | .34                | 1.20 (1.02–1.41)            | .03 <sup>c</sup>   |
| Coronary artery disease               | 0.89 (0.83–0.95)          | <.001 <sup>d</sup> | 1.01 (0.94–1.09)            | .82                |
| Pulmonary embolism                    | 1.06 (0.76–1.47)          | .74                | 1.19 (0.85–1.66)            | .32                |
| Deep vein thrombosis                  | 0.82 (0.70–0.96)          | .02 <sup>c</sup>   | 0.97 (0.82–1.14)            | .67                |
| Hypothyroid                           | 1.09 (0.98–1.21)          | .12                | 1.10 (0.99–1.22)            | .08                |
| Subarachnoid hemorrhage               | 1.04 (0.80–1.34)          | .78                | 1.31 (1.01–1.70)            | .04 <sup>c</sup>   |
| Nontraumatic intracerebral hemorrhage | 1.06 (0.86–1.31)          | .57                | 1.30 (1.06–1.61)            | .01 <sup>c</sup>   |

|                                    |                  |                    |                  |                     |
|------------------------------------|------------------|--------------------|------------------|---------------------|
| Cerebral infarction                | 1.01 (0.91–1.13) | .82                | 1.20 (1.07–1.34) | .001*               |
| Heart failure                      | 1.00 (0.93–1.07) | 1.00               | 1.19 (1.10–1.28) | <.001 <sup>d</sup>  |
| Inflammatory bowel disease         | 1.04 (0.88–1.23) | .69                | 1.23 (1.04–1.46) | .02 <sup>c</sup>    |
| <b>Psychiatric comorbidities</b>   |                  |                    |                  |                     |
| Organic mental disorder            | 1.18 (0.99–1.40) | .07                | 1.01 (0.84–1.20) | .96                 |
| Substance use disorder             | 1.34 (1.18–1.53) | <.001 <sup>d</sup> | 1.23 (1.08–1.41) | .002 <sup>c</sup>   |
| Schizophrenia                      | 1.64 (1.55–1.74) | <.001 <sup>d</sup> | 1.00 (0.93–1.08) | .95                 |
| Mood disorders                     | 2.21 (2.15–2.26) | <.001 <sup>d</sup> | 1.47 (1.41–1.53) | <.001 <sup>d</sup>  |
| Anxiety disorder                   | 1.76 (1.71–1.80) | <.001 <sup>d</sup> | 1.28 (1.25–1.32) | <.001 <sup>d</sup>  |
| Behavioral and emotional disorders | 1.59 (1.46–1.72) | <.001 <sup>d</sup> | 1.20 (1.10–1.30) | <.001 <sup>d</sup>  |
| Personality disorder               | 1.88 (1.50–2.35) | <.001 <sup>d</sup> | 1.26 (1.00–1.57) | .046 <sup>c</sup>   |
| Intellectual disability            | 1.12 (0.85–1.48) | .43                | 0.88 (0.66–1.16) | .36                 |
| Psychological development disorder | 1.35 (1.19–1.54) | <.001 <sup>d</sup> | 0.87 (0.75–1.00) | .04 <sup>c</sup>    |
| BEDCA and UMD                      | 1.74 (1.58–1.93) | <.001 <sup>d</sup> | 1.25 (1.13–1.39) | <.001 <sup>**</sup> |
| <b>Psychotropic medications</b>    |                  |                    |                  |                     |
| Antidepressants                    | 2.14 (2.09–2.20) | <.001 <sup>d</sup> | 1.24 (1.19–1.30) | <.001 <sup>d</sup>  |
| Anxiolytics                        | 1.82 (1.77–1.87) | <.001 <sup>d</sup> | 1.25 (1.21–1.29) | .001 <sup>c</sup>   |
| Antipsychotics                     | 1.66 (1.59–1.74) | <.001 <sup>d</sup> | 1.24 (1.16–1.32) | <.001 <sup>d</sup>  |

**Note:**

<sup>a</sup> Large hazard ratios indicate more monotherapy failures, whereas small hazard ratios indicate fewer monotherapy failures.

<sup>b</sup> Adjusted for age group (20–39, 40–64, ≥65 years), sex, administration instructions of the first prescribed hypnotic (as-needed only or regular prescription), concomitant anxiolytics, concomitant antidepressants, concomitant antipsychotics, comorbid psychiatric disorders, and comorbid physical disorders in the month of the first prescription.

<sup>c</sup> P-value <.05

<sup>d</sup> P-value <.001

**Abbreviations:** aHR, adjusted hazard ratio; BEDCA, behavioral and emotional disorders with onset usually occurring in childhood and adolescence; CI, confidence interval; COPD, chronic obstructive pulmonary disease; CHR, crude hazard ratio; UMD, unspecified mental disorder

**eTable 6.** Sensitivity Analyses of Cox Proportional Hazards Regression Analysis

|                                                                     | Adjusted HR (95%CI) <sup>a,b</sup> | P-value            |
|---------------------------------------------------------------------|------------------------------------|--------------------|
| <b><i>Under 64 years old<sup>c</sup></i></b>                        |                                    |                    |
| Eszopiclone                                                         | 1 [Reference]                      |                    |
| Ramelteon                                                           | 1.21 (1.15–1.28)                   | <.001 <sup>k</sup> |
| Suvorexant                                                          | 1.04 (0.99–1.08)                   | .12                |
| Zolpidem                                                            | 0.84 (0.80–0.87)                   | <.001 <sup>k</sup> |
| Triazolam                                                           | 0.82 (0.77–0.87)                   | <.001 <sup>k</sup> |
| <b><i>Without mood disorder<sup>d</sup></i></b>                     |                                    |                    |
| Eszopiclone                                                         | 1 [Reference]                      |                    |
| Ramelteon                                                           | 1.24 (1.15–1.33)                   | <.001 <sup>k</sup> |
| Suvorexant                                                          | 1.05 (0.99–1.11)                   | .12                |
| Zolpidem                                                            | 0.80 (0.77–0.84)                   | <.001 <sup>k</sup> |
| Triazolam                                                           | 0.77 (0.71–0.83)                   | <.001 <sup>k</sup> |
| <b><i>Without anxiety disorder<sup>e</sup></i></b>                  |                                    |                    |
| Eszopiclone                                                         | 1 [Reference]                      |                    |
| Ramelteon                                                           | 1.28 (1.20–1.37)                   | <.001 <sup>k</sup> |
| Suvorexant                                                          | 1.06 (1.01–1.12)                   | .03 <sup>j</sup>   |
| Zolpidem                                                            | 0.84 (0.80–0.88)                   | <.001 <sup>k</sup> |
| Triazolam                                                           | 0.83 (0.78–0.90)                   | <.001 <sup>k</sup> |
| <b><i>Without mood or anxiety disorder<sup>f</sup></i></b>          |                                    |                    |
| Eszopiclone                                                         | 1 [Reference]                      |                    |
| Ramelteon                                                           | 1.34 (1.23–1.47)                   | <.001 <sup>k</sup> |
| Suvorexant                                                          | 1.09 (1.01–1.17)                   | .02 <sup>i</sup>   |
| Zolpidem                                                            | 0.80 (0.75–0.85)                   | <.001 <sup>k</sup> |
| Triazolam                                                           | 0.77 (0.70–0.85)                   | <.001 <sup>k</sup> |
| <b><i>Without any psychiatric disorder<sup>g</sup></i></b>          |                                    |                    |
| Eszopiclone                                                         | 1 [Reference]                      |                    |
| Ramelteon                                                           | 1.32 (1.20–1.45)                   | <.001 <sup>k</sup> |
| Suvorexant                                                          | 1.10 (1.02–1.18)                   | .02 <sup>i</sup>   |
| Zolpidem                                                            | 0.79 (0.75–0.84)                   | <.001 <sup>k</sup> |
| Triazolam                                                           | 0.75 (0.68–0.83)                   | <.001 <sup>k</sup> |
| <b><i>Monotherapy failure considering trazodone<sup>h</sup></i></b> |                                    |                    |
| Eszopiclone                                                         | 1 [Reference]                      |                    |
| Ramelteon                                                           | 1.23 (1.17–1.30)                   | <.001 <sup>k</sup> |
| Suvorexant                                                          | 1.06 (1.02–1.10)                   | .008 <sup>j</sup>  |
| Zolpidem                                                            | 0.84 (0.81–0.87)                   | <.001 <sup>k</sup> |
| Triazolam                                                           | 0.81 (0.76–0.85)                   | <.001 <sup>k</sup> |

**After November 2014<sup>i</sup>**

|             |                  |                    |
|-------------|------------------|--------------------|
| Eszopiclone | 1 [Reference]    |                    |
| Ramelteon   | 1.24 (1.18–1.31) | <.001 <sup>k</sup> |
| Suvorexant  | 1.04 (0.99–1.08) | .10                |
| Zolpidem    | 0.83 (0.80–0.87) | <.001 <sup>k</sup> |
| Triazolam   | 0.80 (0.75–0.85) | <.001 <sup>k</sup> |

---

**Note:**

<sup>a</sup> Large hazard ratios indicate more monotherapy failures, whereas small hazard ratios indicate fewer monotherapy failures.

<sup>b</sup> Adjusted for age group (20–39, 40–64, ≥65 years), sex, administration instructions of the first prescribed hypnotic (as-needed only or regular prescription), concomitant anxiolytics, concomitant antidepressants, concomitant antipsychotics, comorbid psychiatric disorders, and comorbid physical disorders in the month of the first prescription.

<sup>c</sup> Sensitivity analysis in patients under 64 years of age prescribed guideline-recommended sleep medications for the first time.

<sup>d</sup> Sensitivity analysis in patients without mood disorder

<sup>e</sup> Sensitivity analysis in patients without anxiety disorder

<sup>f</sup> Sensitivity analysis in patients without mood or anxiety disorder

<sup>g</sup> Sensitivity analysis in patients without any psychiatric disorder

<sup>h</sup> Sensitivity analysis of monotherapy failure considering trazodone

<sup>i</sup> Sensitivity analysis of patients who were first prescribed hypnotics after November 2014, when all guideline-recommended hypnotics became available for prescription in Japan.

<sup>j</sup> P-value <.05

<sup>k</sup> P-value <.001

**Abbreviations:** CI, confidence interval; HR, hazard ratio

**eTable 7.** Events Occurring Within 6 Months of First Prescription of Guideline-Recommended Hypnotics Among Patients Without Failure of Guideline-Recommended Hypnotic Monotherapy

|                             | Eszopiclone       | Ramelteon         | Suvorexant        | Zolpidem           | Triazolam         | Total              |
|-----------------------------|-------------------|-------------------|-------------------|--------------------|-------------------|--------------------|
|                             | N=29,988          | N=12,330          | N=32,780          | N=123,426          | N=16,266          | N=214,790          |
| Monotherapy discontinuation | 24,857<br>(82.9%) | 10,468<br>(84.9%) | 27,538<br>(84.0%) | 105,138<br>(85.2%) | 13,622<br>(83.7%) | 181,623<br>(84.6%) |
| Continuation for 6 months   | 3,627<br>(12.1%)  | 1,268<br>(10.3%)  | 3,564<br>(10.9%)  | 12,915<br>(10.5%)  | 1,897<br>(11.7%)  | 23,271<br>(10.8%)  |
| Censor                      | 1,504<br>(5.0%)   | 594<br>(4.8%)     | 1,678<br>(5.1%)   | 5,373<br>(4.4%)    | 747<br>(4.6%)     | 9,896<br>(4.6%)    |

**eTable 8.** Crude and Adjusted Logistic Regression Analyses

|                                       | cOR (95% CI) <sup>a</sup> | P-value            | aOR (95% CI) <sup>a,b</sup> | P-value            |
|---------------------------------------|---------------------------|--------------------|-----------------------------|--------------------|
| <b>Guideline-recommended hypnotic</b> |                           |                    |                             |                    |
| Eszopiclone                           | 1 [Reference]             |                    | 1 [Reference]               |                    |
| Ramelteon                             | 1.16 (1.10–1.23)          | <.001 <sup>d</sup> | 1.31 (1.24–1.40)            | <.001 <sup>d</sup> |
| Suvorexant                            | 1.08 (1.04–1.13)          | <.001 <sup>d</sup> | 1.20 (1.15–1.26)            | <.001 <sup>d</sup> |
| Zolpidem                              | 1.19 (1.15–1.23)          | <.001 <sup>d</sup> | 1.00 (0.97–1.04)            | .97                |
| Triazolam                             | 1.06 (1.01–1.12)          | .02 <sup>c</sup>   | 1.02 (0.97–1.07)            | .50                |
| <b>Age group</b>                      |                           |                    |                             |                    |
| 20–39 years                           | 1 [Reference]             |                    | 1 [Reference]               |                    |
| 40–64 years                           | 1.08 (1.06–1.11)          | <.001 <sup>d</sup> | 0.92 (0.90–0.95)            | <.001 <sup>d</sup> |
| 65 years or more                      | 0.84 (0.80–0.87)          | <.001 <sup>d</sup> | 0.65 (0.62–0.69)            | <.001 <sup>d</sup> |
| <b>Sex</b>                            |                           |                    |                             |                    |
| Male                                  | 1 [Reference]             |                    | 1 [Reference]               |                    |
| Female                                | 1.19 (1.16–1.22)          | <.001 <sup>d</sup> | 1.09 (1.06–1.11)            | <.001 <sup>d</sup> |
| <b>Prescription instruction</b>       |                           |                    |                             |                    |
| As-needed only                        | 1 [Reference]             |                    | 1 [Reference]               |                    |
| Regular                               | 0.48 (0.47–0.50)          | <.001 <sup>d</sup> | 0.51 (0.49–0.52)            | <.001 <sup>d</sup> |
| <b>Physical comorbidities</b>         |                           |                    |                             |                    |
| Hypertension                          | 0.79 (0.77–0.82)          | <.001 <sup>d</sup> | 0.70 (0.68–0.73)            | <.001 <sup>d</sup> |
| Hyperlipidemia                        | 0.84 (0.81–0.86)          | <.001 <sup>d</sup> | 0.88 (0.84–0.91)            | <.001 <sup>d</sup> |
| Diabetes                              | 0.83 (0.80–0.86)          | <.001 <sup>d</sup> | 0.86 (0.83–0.90)            | <.001 <sup>d</sup> |
| Cancer                                | 1.18 (1.13–1.24)          | <.001 <sup>d</sup> | 0.86 (0.82–0.90)            | <.001 <sup>d</sup> |
| Rheumatoid arthritis                  | 0.92 (0.82–1.03)          | .14                | 0.84 (0.75–0.95)            | .003 <sup>c</sup>  |
| Parkinson's disease                   | 0.43 (0.37–0.49)          | <.001 <sup>d</sup> | 0.63 (0.54–0.73)            | <.001 <sup>d</sup> |
| Multiple sclerosis                    | 1.10 (0.74–1.65)          | .63                | 0.79 (0.52–1.19)            | .25                |
| Asthma                                | 1.03 (0.98–1.08)          | .23                | 0.99 (0.94–1.05)            | .81                |
| Chronic obstructive pulmonary disease | 0.99 (0.85–1.15)          | .86                | 1.00 (0.85–1.17)            | .99                |
| Coronary artery disease               | 1.08 (1.01–1.15)          | .02 <sup>c</sup>   | 1.23 (1.15–1.32)            | <.001 <sup>d</sup> |
| Pulmonary embolism                    | 0.98 (0.72–1.33)          | .88                | 0.76 (0.55–1.05)            | .09                |
| Deep vein thrombosis                  | 1.44 (1.24–1.68)          | <.001 <sup>d</sup> | 1.27 (1.08–1.49)            | .004 <sup>c</sup>  |
| Hypothyroid                           | 0.89 (0.81–0.98)          | .02 <sup>c</sup>   | 0.96 (0.87–1.07)            | .48                |
| Subarachnoid hemorrhage               | 2.15 (1.54–3.00)          | <.001 <sup>d</sup> | 2.01 (1.43–2.82)            | <.001 <sup>d</sup> |
| Nontraumatic intracerebral hemorrhage | 1.23 (0.99–1.53)          | .06                | 1.25 (1.00–1.56)            | .06                |
| Cerebral infarction                   | 0.87 (0.79–0.96)          | .004 <sup>c</sup>  | 0.94 (0.84–1.04)            | .20                |



|                                    |                  |                    |                  |                    |
|------------------------------------|------------------|--------------------|------------------|--------------------|
| Heart failure                      | 1.01 (0.94–1.08) | .87                | 1.00 (0.93–1.08) | .92                |
| Inflammatory bowel disease         | 1.02 (0.87–1.20) | .80                | 0.79 (0.67–0.94) | .006 <sup>c</sup>  |
| <b>Psychiatric comorbidities</b>   |                  |                    |                  |                    |
| Organic mental disorder            | 0.64 (0.55–0.75) | <.001 <sup>d</sup> | 0.76 (0.65–0.90) | .001 <sup>c</sup>  |
| Substance use disorder             | 0.81 (0.71–0.92) | .002 <sup>c</sup>  | 0.90 (0.78–1.03) | .12                |
| Schizophrenia                      | 0.44 (0.42–0.47) | <.001 <sup>d</sup> | 0.80 (0.75–0.87) | <.001 <sup>d</sup> |
| Mood disorders                     | 0.40 (0.39–0.41) | <.001 <sup>d</sup> | 0.60 (0.58–0.63) | <.001 <sup>d</sup> |
| Anxiety disorder                   | 0.57 (0.55–0.58) | <.001 <sup>d</sup> | 0.76 (0.73–0.78) | <.001 <sup>d</sup> |
| Behavioral and emotional disorders | 0.64 (0.59–0.70) | <.001 <sup>d</sup> | 0.88 (0.81–0.97) | .006 <sup>c</sup>  |
| Personality disorder               | 0.57 (0.45–0.74) | <.001 <sup>d</sup> | 0.89 (0.69–1.15) | .38                |
| Intellectual disability            | 0.49 (0.39–0.61) | <.001 <sup>d</sup> | 0.59 (0.47–0.76) | <.001 <sup>d</sup> |
| Psychological development disorder | 0.48 (0.43–0.54) | <.001 <sup>d</sup> | 0.70 (0.62–0.80) | <.001 <sup>d</sup> |
| BEDCA and UMD                      | 0.49 (0.44–0.55) | <.001 <sup>d</sup> | 0.68 (0.61–0.77) | <.001 <sup>d</sup> |
| <b>Psychotropic medications</b>    |                  |                    |                  |                    |
| Antidepressants                    | 0.39 (0.38–0.40) | <.001 <sup>d</sup> | 0.67 (0.64–0.69) | <.001 <sup>d</sup> |
| Anxiolytics                        | 0.48 (0.45–0.50) | <.001 <sup>d</sup> | 0.82 (0.79–0.84) | <.001 <sup>d</sup> |
| Antipsychotics                     | 0.52 (0.51–0.53) | <.001 <sup>d</sup> | 0.67 (0.63–0.72) | <.001 <sup>d</sup> |

**Note:**

<sup>a</sup> Large odds ratios indicate more successful discontinuations, whereas small odds ratios indicate fewer successful discontinuations.

<sup>b</sup> Adjusted for age group (20–39, 40–64, ≥65 years), sex, administration instructions of the first prescribed hypnotic (as-needed only or regular prescription), concomitant anxiolytics, concomitant antidepressants, concomitant antipsychotics, comorbid psychiatric disorders, and comorbid physical disorders in the month of the first prescription.

<sup>c</sup> P-value <.05

<sup>d</sup> P-value <.001

**Abbreviations:** aOR, adjusted odds ratio; BEDCA, behavioral and emotional disorders with onset usually occurring in childhood and adolescence; CI, confidence interval; cOR, crude odds ratio; UMD, unspecified mental disorder
